Retraction

## Retraction: MicroRNA-218 inhibits proliferation and invasion in ovarian cancer by targeting Runx2

Na Li<sup>1</sup>, Lufei Wang<sup>2</sup>, Guangyun Tan<sup>3</sup>, Zhiheng Guo<sup>1</sup>, Lei Liu<sup>1</sup>, Ming Yang<sup>4,\*</sup> and Jin He<sup>1,\*</sup>

<sup>1</sup>Department of Gynecology and Obstetrics, The First Hospital of Jilin University, Changchun, Jilin 130021, PR China

<sup>2</sup>Department of Ophthalmology, The Second Hospital of Jilin University, Changchun, Jilin 130022, PR China

<sup>3</sup>Department of Immunology, Institute of Translational Medicine of The First Hospital of Jilin University, Changchun, Jilin 130021, PR China

<sup>4</sup>Department of Breast Surgery, The First Hospital of Jilin University, Changchun, Jilin 130021, PR China

\*These authors have contributed equally to this work

**Published:**

**Copyright:** © 2022 Li et al. This is an open access article distributed under the terms of the [Creative Commons Attribution License](#) (CC BY 3.0), which permits unrestricted use, distribution, and reproduction in any medium, provided the original author and source are credited.

**This article has been retracted:** It has been brought to our attention that Figures 2 and 5 have unexpected similarities to data appearing in other articles by different authors. Oncotarget's investigation has confirmed the data similarities. Based on the fact that those data had already been published elsewhere, or were already under consideration for publication prior to submission to Oncotarget, the journal has decided that this paper should be retracted. Oncotarget's attempts to contact the authors and their Institution for their comments were unsuccessful. Oncotarget expresses gratitude to the reviewers on PubPeer.

Original article: Oncotarget. 2017; 8:91530–91541. <https://doi.org/10.18632/oncotarget.21069>
